# Supplementary material
Source: PubMed Central journal article supplement (PMC4764775)
Supplement: ijmsv13p0099s1.pdf [file ijmsv13p0099s1.pdf]

## Supplementary Materials

**Figure S1. Geographical distribution of the number of hypertension-related records.**

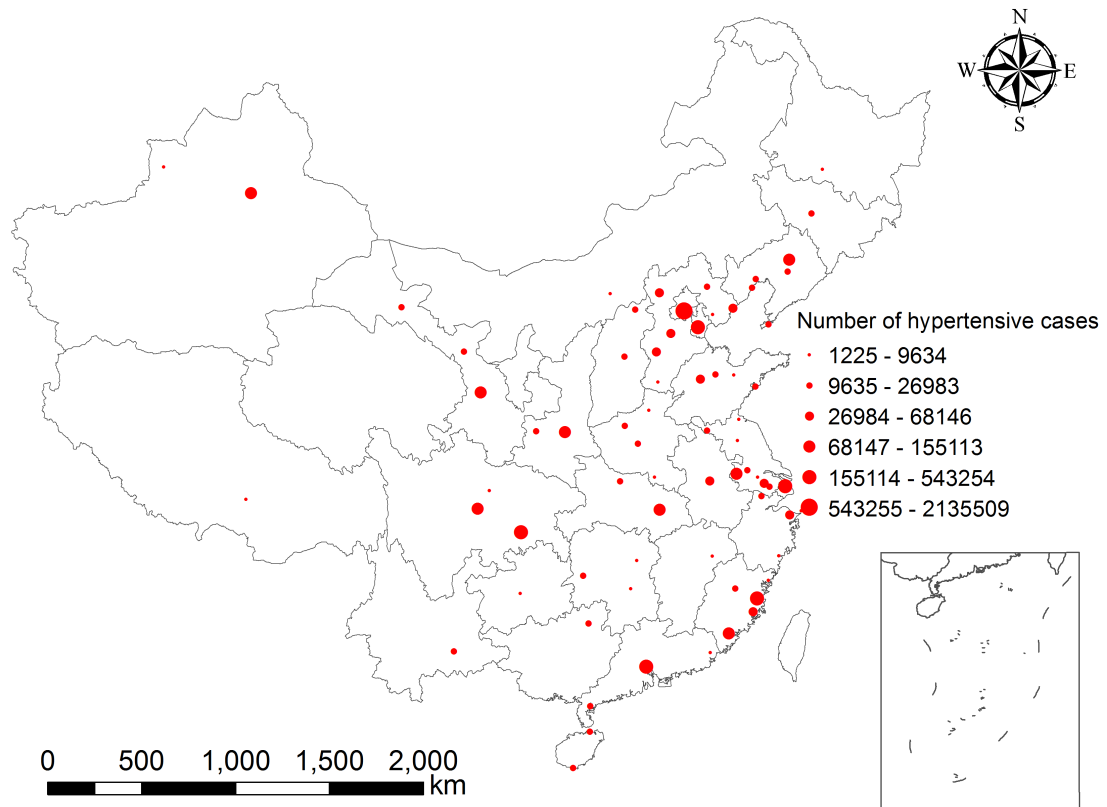

**Figure S2. Odds ratios of comorbidities of hypertension for males to females in China.**

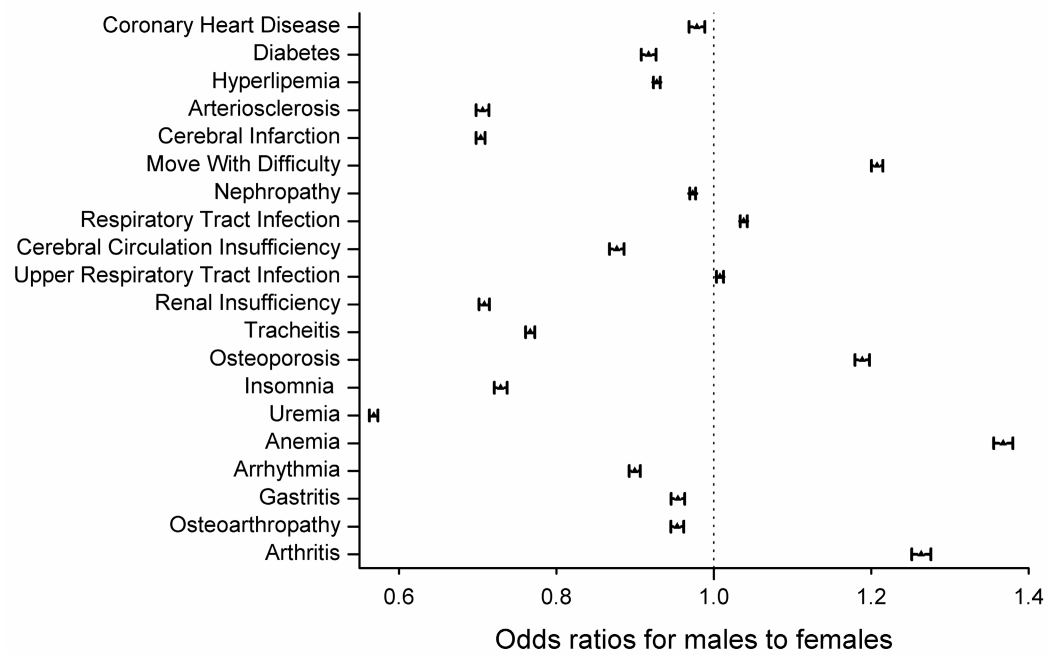

**Table S1. Top comorbidity pairs of hypertension.**

| <b>No.</b> | <b>Comorbidity Pairs</b>          |                             | <b>Detection Rate (%)</b> | <b>95% CI</b> |
|------------|-----------------------------------|-----------------------------|---------------------------|---------------|
| 1          | Arteriosclerosis                  | Coronary Heart Disease      | 10.11                     | 10.08-10.13   |
| 2          | Coronary Heart Disease            | Hyperlipemia                | 6.99                      | 6.97-7.01     |
| 3          | Arteriosclerosis                  | Hyperlipemia                | 5.77                      | 5.75-5.79     |
| 4          | Diabetes                          | Coronary Heart Disease      | 4.89                      | 4.87-4.90     |
| 5          | Diabetes                          | Hyperlipemia                | 3.55                      | 3.54-3.57     |
| 6          | Arteriosclerosis                  | Diabetes                    | 3.16                      | 3.14-3.17     |
| 7          | Upper Respiratory Tract Infection | Respiratory Tract Infection | 3.07                      | 3.06-3.09     |
| 8          | Coronary Heart Disease            | Cerebral Infarction         | 2.16                      | 2.15-2.17     |
| 9          | Move With Difficulty              | Coronary Heart Disease      | 2.14                      | 2.13-2.15     |
| 10         | Move With Difficulty              | Hyperlipemia                | 1.99                      | 1.98-2.00     |
| 11         | Tracheitis                        | Bronchiolitis               | 1.91                      | 1.90-1.92     |
| 12         | Anemia                            | Nephropathy                 | 1.89                      | 1.87-1.90     |
| 13         | Uremia                            | Nephropathy                 | 1.88                      | 1.87-1.89     |
| 14         | Hyperlipemia                      | Cerebral Infarction         | 1.86                      | 1.85-1.87     |
| 15         | Arrhythmia                        | Coronary Heart Disease      | 1.79                      | 1.78-1.80     |
